# Supplementary material
Source: PubMed Central journal article supplement (PMC4225775)

Supplementary Table 1

| Proteins              |               | Type I |     |     |     |      |      | Type II |      |      | Type III |       |
|-----------------------|---------------|--------|-----|-----|-----|------|------|---------|------|------|----------|-------|
| Cas core              | Cas non-core  | I-A    | I-B | I-C | I-D | I-E  | I-F  | II-A    | II-B | II-C | III-A    | III-B |
| Cas1                  |               |        |     |     |     |      |      |         |      |      |          |       |
| Cas2                  |               |        |     |     |     |      | [1]  |         |      |      |          |       |
| Cas3                  |               |        |     |     |     |      |      |         |      |      |          |       |
| Cas4                  |               |        |     |     |     |      |      |         |      |      |          |       |
|                       | Csa1, Csn2    | Csa1   |     |     |     |      |      | Csn2    |      |      |          |       |
| Cas5                  |               |        |     | 5d  |     |      |      |         |      |      |          |       |
| Cas5                  |               |        |     | 5d  |     |      | Csy2 |         |      |      | Csm4     | Cmr3  |
| Cas6                  |               |        |     |     |     | 6e   | 6f   |         |      |      |          |       |
| Cas6                  |               |        |     |     |     | 6e   | 6f   |         |      |      | Csm4     | Cmr3  |
| Cas7                  |               |        |     |     |     |      | Csy3 |         |      |      | Csm3     | Cmr4  |
| Cas7#                 |               |        |     |     |     |      |      |         |      |      |          | Cmr4# |
| Cas8 (Large Subunit)  |               | 8a2    | 8b  | 8c  | [2] | Cse1 | Csy1 |         |      |      |          |       |
|                       | Small Subunit | Csa5   | [3] | [3] | [3] | Cse2 | [3]  |         |      |      | Csm2     | Cmr5  |
| Cas9                  |               |        |     |     |     |      |      |         |      |      |          |       |
| Cas9                  |               |        |     |     |     |      |      |         |      |      |          |       |
| Cas10 (Large Subunit) |               |        |     |     | 10d |      |      |         |      |      | Csm1     | Cmr2  |
|                       | Cmr1          |        |     |     |     |      |      |         |      |      |          | Cmr1  |
|                       | Csm5, Cmr6    |        |     |     |     |      |      |         |      |      | Csm5     | Cmr6  |
|                       | Csx1#         |        |     |     |     |      |      |         |      |      | Csm6#    |       |

a

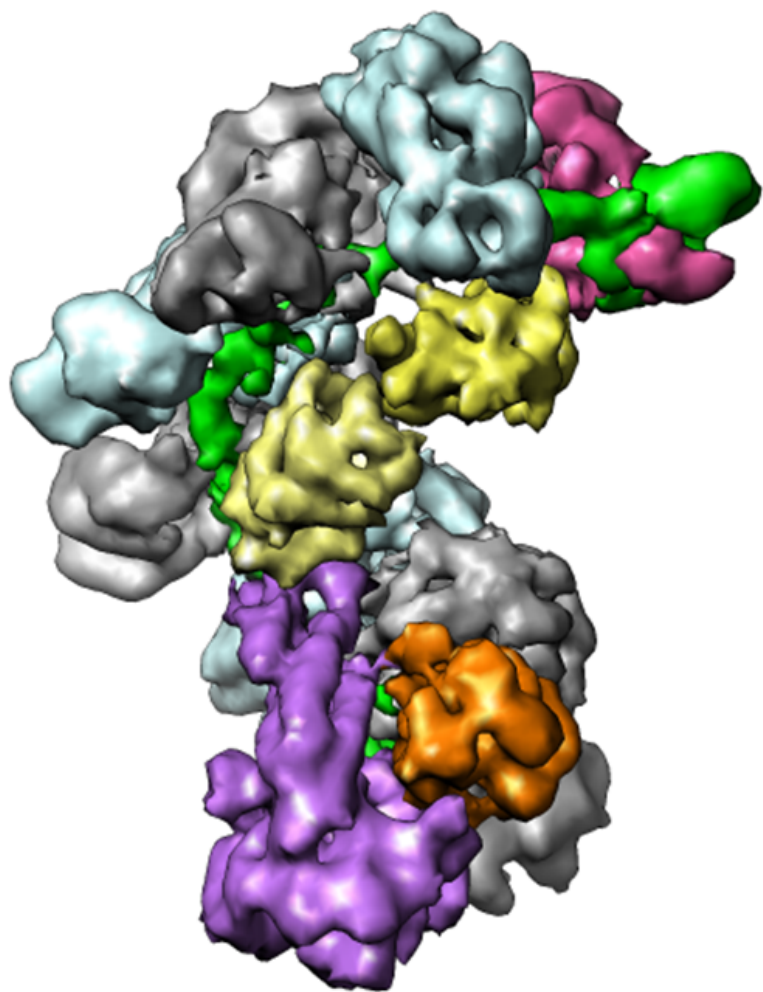

b

I-E  
(Cse)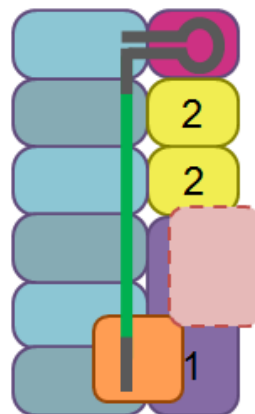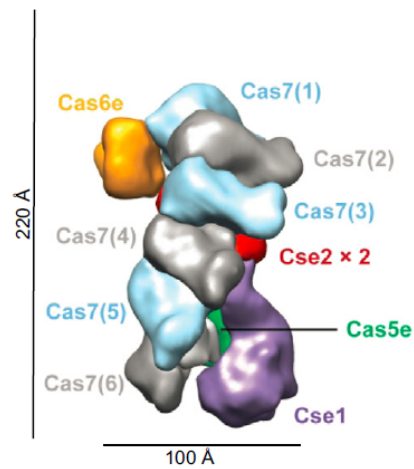

c

III-B  
(Cmr)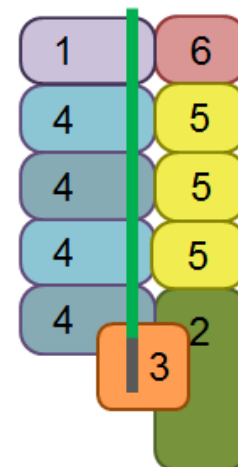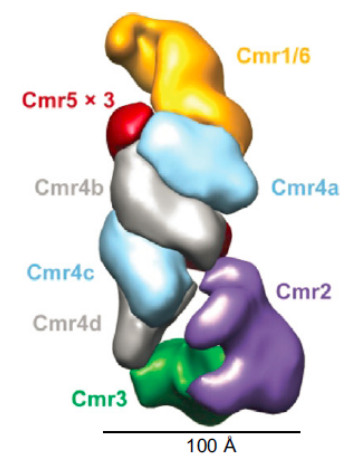

a

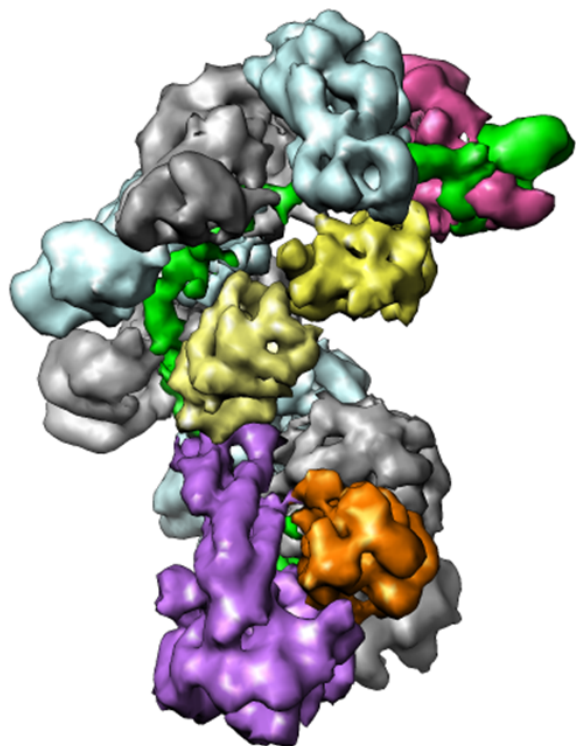

b

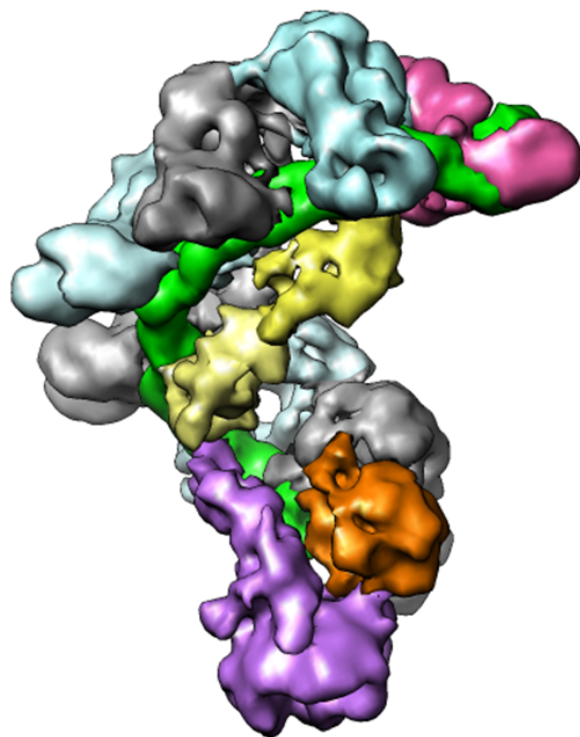

c

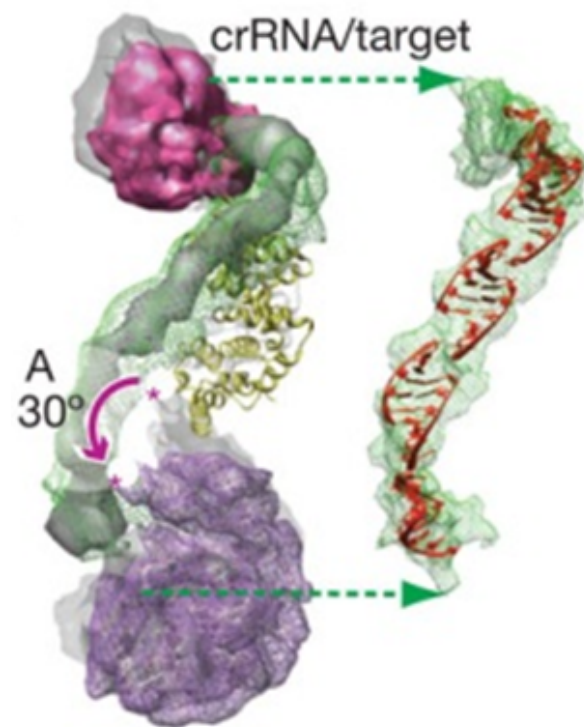

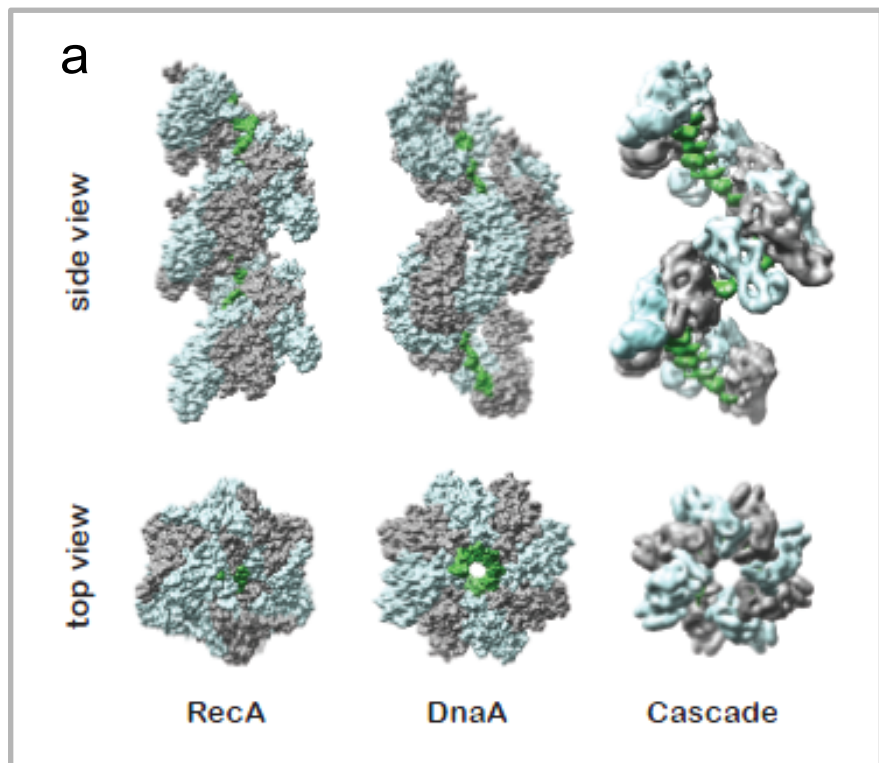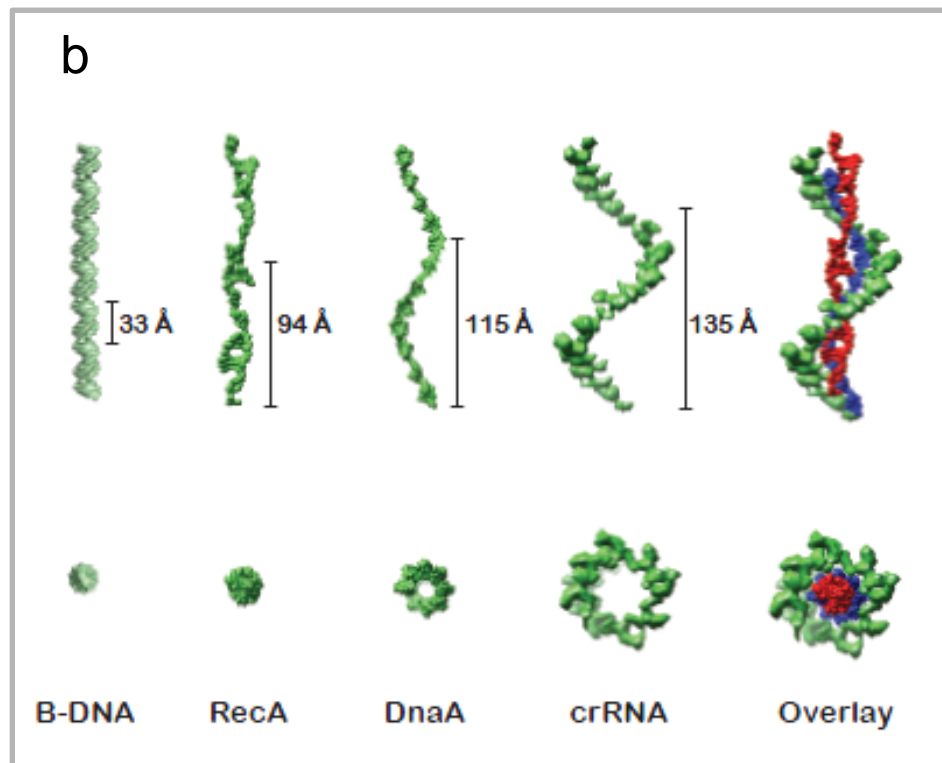

Supplement: NIHMS639533-supplement-Supplemental_figs.pdf [file NIHMS639533-supplement-Supplemental_figs.pdf]
